# Supplementary material
Source: Springer Nature journal article supplement (https://www.springermedizin.de/resource/supplementary/12876_2006_187_MOESM3_ESM.pdf/9438882)

AVE  
LIGHT+4  
FILM 07

Downhill  
Esophageal  
Varices

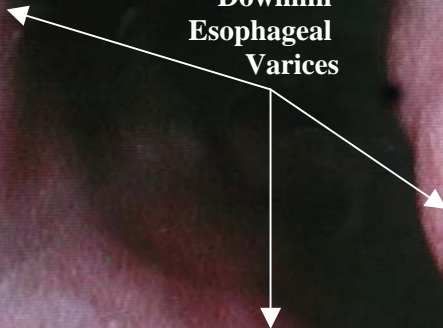

Supplement: MOESM3 [file 9438882]
